# Supplementary material for: Estimating microplastics emissions from offshore wind turbine blades in the Dutch North Sea
Source: Copernicus journal article supplement (doi:10.5194/wes-2024-175), 2024-12-19
Supplement: Supplementary file 1 [file wes-2024-175-supplement.zip]

## Sheet: AppendixTable1
WindfarmId	Wind farm name	Capacity, MW	TurbineModel	Park Construction Start	In commission	Start year	Turbine number	Capacity, MW	Lifetime (assumed)	Decommmisioning date	Blade lenght, m	Rotor diameter, m	Source	LEP lenght using 25% of blade lenght	Loss, Average. year (kg)	Loss, average per wind park, year
NL01	Prinses Amaliawindpark	120	V80-2.0 MW (Vestas)	2006-09-22	2008-07-24	2006	60	2	25	2031	39	80	Vestas brochure	9.75	0.0778411	4.67047
NL02	Egmond aan Zee	108	V90-3.0 MW Offshore (Vestas)	2006-04-18	2007-01-01	2006	36	3	25	2031	44	90	Vestas brochure	11	0.0878208	3.16155
NL32	Eneco Luchterduinen	129	V112-3.0 MW Offshore (MHI Vestas Offshore Wind)	2014-07-23	2015-09-21	2014	43	3	25	2039	54.65	112	Vestas brochure	13.6625	0.109077	4.69033
NL85	Westermeerwind	144	SWT-3.0-108 (Siemens)	2015-03-10	2016-06-20	2015	48	3	25	2040	53	108	Siemens brochure	13.25	0.105784	5.07764
NL18	Gemini	600	SWT-4.0-130 (Siemens)	2015-07-01	2017-04-28	2015	150	4	25	2040	63.4	130	Gomez et al, 2020	15.85	0.126542	18.9813
NL0J	Borssele 3 and 4 - Blauwwind	731.5	V164-9.5 MW (MHI Vestas Offshore Wind)	2019-10-23	2021-01-06	2019	77	9.5	25	2044	80	164	Ahmed et al., 2013	20	0.159674	12.2949
NL88	Borssele Site V -Leeghwater - Innovation Plot	19	V164-9.5 MW (MHI Vestas Offshore Wind)	2020-04-22	2021-02-25	2020	2	9.5	25	2045	80	164	Ahmed et al., 2013	20	0.159674	0.319348
NL0G	Windpark Fryslân	382.7	SWT-DD-130 (Siemens Gamesa)	2020-09-07	2021-12-08	2020	89	4.3	25	2045	63.4371	130	Assumed based on rotor diameter	15.8593	0.126616	11.2688
NL0B	Borssele 1 and 2	752	SG 8.0-167 DD (Siemens Gamesa)	2020-01-12	2020-11-27	2020	94	8	25	2045	81.4	167	Siemens brochure	20.35	0.162468	15.272
NL0E	Hollandse Kust Zuid Holland III and IV	770	SG 11.0-193 DD (Siemens Gamesa), Installed turbines over the project is 139, one less than the 140 originally planned. This is due to a collision with a cargo ship in January 2021. After consultation with partners, contractors and authorities, they concluded that the foundation was damag	2021-07-05	2024-09-30	2021	69	11	25	2046	94	193	Siemens brochure	23.5	0.187617	12.9456
NL0D	Hollandse Kust Zuid Holland I and II	770	SG 11.0-193 DD (Siemens Gamesa)	2021-07-05	2023-09-29	2021	70	11	25	2046	94	193	Siemens brochure	23.5	0.187617	13.1332
NL0F	Hollandse Kust Noord	759	SG 11.0-200 DD (Siemens Gamesa)	2022-10-17	2023-12-20	2022	69	11	25	2047	97	200	Siemens brochure	24.25	0.193605	13.3587
NL1E	Windplanblauw	132	GE Cypress 5.5 MW	2022-06-23	2024-09-01	2022	24	5.5	25	2047	77.1005	158	Wind power NL, 2024	19.2751	0.153887	3.69328
NL0O	Ecowende	724.5	V236-15.0 MW (Vestas)	2022-08-15	2026-12-31	2025	52	15	25	2050	115.5	236	Vestas brochure	28.875	0.230529	11.9875
NL1Q	OranjeWind	795	V236-15.0 MW (Vestas)	2025-01-01	2026-01-01	2025	53	15	25	2050	115.5	236	Vestas brochure	28.875	0.230529	12.2181
NL0Q	IJmuiden Ver Alpha	2000	Not Decided	2028-01-01	2029-07-01	2028	125	16	30	2058	120.503	246.954	Linear relation capacity and size	30.1257	0.240514	30.0643
NL0S	IJmuiden Ver Beta	2000	Not Decided	2028-01-01	2029-10-01	2028	125	16	30	2058	120.503	246.954	Linear relation capacity and size	30.1257	0.240514	30.0643
NL2Z	Nederwiek Zuid I-B	1000	Not Decided	2029-01-01	2030-12-31	2028	63	16	30	2058	120.503	246.954	Linear relation capacity and size	30.1257	0.240514	15.1524
NL1T	Nederwiek Zuid I-A	1000	Not Decided	2029-01-01	2030-12-31	2028	63	16	30	2058	120.503	246.954	Linear relation capacity and size	30.1257	0.240514	15.1524
NL0X	IJmuiden Ver Gamma A	1000	Not Decided	2028-01-01	2031-07-01	2029	59	17	30	2059	125.739	257.683	Linear relation capacity and size	31.4347	0.250965	14.8069
NL3A	IJmuiden Ver Gamma B	1000	Not Decided	2028-01-01	2031-07-01	2029	59	17	30	2059	125.739	257.683	Linear relation capacity and size	31.4347	0.250965	14.8069
NL1H	Nederwiek Noord III	2000	Not Decided	2030-01-01	2031-12-31	2030	112	18	30	2060	130.975	268.412	Linear relation capacity and size	32.7437	0.261416	29.2786
NL1S	NWBE	2000	Not Decided	2029-01-01	2032-04-01	2030	112	18	30	2060	130.975	268.412	Linear relation capacity and size	32.7437	0.261416	29.2786
NL1M	Doordewind I	2000	Not Decided	2030-01-01	2032-12-31	2031	112	18	30	2061	130.975	268.412	Linear relation capacity and size	32.7437	0.261416	29.2786
NL0P	Ten noorden van de Waddeneilanden	760	minimum 10 MW, up to 304 m tip height, rotor diameter up to 232	2030-01-01	2033-01-01	2031	43	18	30	2061	130.975	268.412	Linear relation capacity and size	32.7437	0.261416	11.2409
NL1F	Hollandse Kust West VIII	700	Not Decided		2032-01-01	2032	37	19	30	2062	136.211	279.141	Linear relation capacity and size	34.0527	0.271867	10.0591
NL1U	Doordewind II	2000	Not Decided	2030-01-01	2033-12-31	2032	106	19	30	2062	136.211	279.141	Linear relation capacity and size	34.0527	0.271867	28.8179
NL0Y	Netherlands- Future Tender A	2500	Not Decided			2033	125	20	30	2063	141.447	289.87	Linear relation capacity and size	35.3618	0.282318	35.2897
NL0Z	Netherlands- Future Tender B	2500	Not Decided			2034	125	20	30	2064	141.447	289.87	Linear relation capacity and size	35.3618	0.282318	35.2897
NL1A	Netherlands- Future Tender C	2500	Not Decided			2035	120	21	30	2065	146.683	300.599	Linear relation capacity and size	36.6708	0.292769	35.1322
NL1B	Netherlands- Future Tender D	2500	Not Decided			2036	114	22	30	2066	151.919	311.328	Linear relation capacity and size	37.9798	0.30322	34.567
NL1C	Netherlands- Future Tender E	2500	Not Decided			2037	114	22	30	2067	151.919	311.328	Linear relation capacity and size	37.9798	0.30322	34.567
NL1D	Netherlands- Future Tender F	2500	Not Decided			2038	109	23	30	2068	157.155	322.057	Linear relation capacity and size	39.2888	0.31367	34.1901
NL1V	Netherlands- Future Tender G	2500	Not Decided			2039	109	23	30	2069	157.155	322.057	Linear relation capacity and size	39.2888	0.31367	34.1901
NL1W	Netherlands- Future Tender H	2500	Not Decided			2040	105	24	30	2070	162.391	332.786	Linear relation capacity and size	40.5979	0.324121	34.0327

## Sheet: References AppendixTable1
Name	Reference
Gomez et al, 2020	Gomez Gonzalez, A., Enevoldsen, P. B., Barlas, A., & Madsen, H. A. (2020). Field test of an active flap system on a full scale wind turbine. Wind Energy Science Discussions, 2020, 1-13.
Ahmed et al., 2013	Ahmed, M. A., & Kim, Y. C. (2013). Hybrid communication network architectures for monitoring large-scale wind turbine. Journal of Electrical Engineering and Technology, 8(6), 1626-1636.
Wind power NL, 2024	https://windpowernl.com/2024/03/21/windplanblauw/. Accessed on 18-11-2024
